# Supplementary material
Source: PubMed Central journal article supplement (PMC6278956)
Supplement: 2017_185306-Disclosures_and_Contributions.pdf [file 2017_185306-Disclosures_and_Contributions.pdf]

Haematologica  
HAEMATOL/2017/185306  
Version 3

Loss of DEP-1 (Ptpnj) promotes myeloproliferative disease in FLT3-ITD  
acute myeloid leukemia

Anne Kresinsky, Reinhard Bauer, Tina M. Schnöder, Tobias Berg,  
Daria Meyer, Volker Ast, Rainer König, Hubert Serve, Florian H. Heidel,  
Frank-D. Böhmer, and Jörg P. Müller

Disclosures: The work was supported by the Deutsche Forschungsgemeinschaft (grant Mu955/11-1) and by the Federal Ministry of Education and Research (BMBF), Germany, FKZ 01ZX1302B, 01ZX1602B (CancerTel-Sys), FKZ: 01EO1002, 01EO1502 (CSCC).

Contributions: Anne Kresinsky: performed research and wrote the manuscript Reinhard Bauer: performed mouse experiments Tina M. Schnöder: contributed vital new reagents and analytical tools Tobias Berg: performed research Daria Meyer: bioinformatic data processing Volker Ast: bioinformatic data processing Rainer König: bioinformatic data processing, designed data processing Hubert Serve: designed and conceptualized research Florian H. Heidel: designed and conceptualized research and wrote the manuscript Frank- D. Böhmer: designed and conceptualized research and wrote the manuscript Jörg P. Müller: designed and conceptualized research, performed research, wrote the paper
